# Supplementary material
Source: Springer Nature journal article supplement (https://www.springermedizin.de/resource/supplementary/13000_2012_732_MOESM2_ESM.pdf/9625388)

**A**

ROC Curve of Chloride concentration

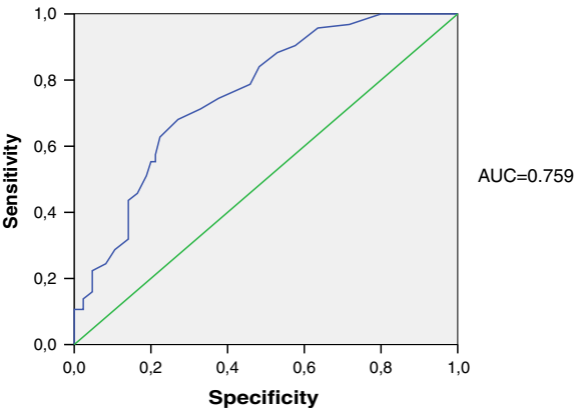**B**

ROC Curve of Sodium concentration

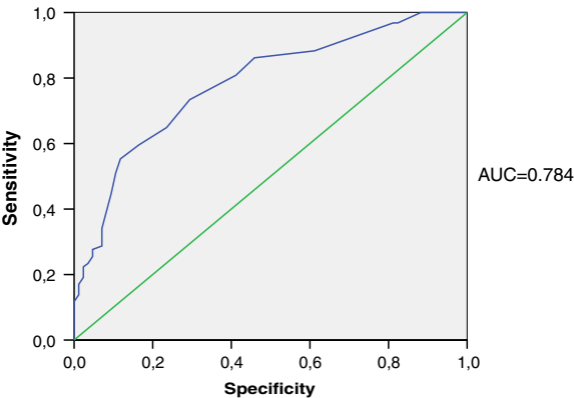

Supplement: MOESM2 [file 9625388]
